# Supplementary material for: TAZ maintains telomere length in TNBC cells by mediating Rad51C expression
Source: Springer Nature journal article supplement (doi:10.1186/s13058-021-01466-z), 2021-09-06

## Supplementary Information

### Supplementary Figure Legends

**Figure S1. TAZ is highly expressed in TNBC.** **A**, mRNA expression levels of TAZ in TNBC and non-TNBC were analyzed with Breast Cancer Integrative Platform database ([www.omicsnet.org/bcancer/database](http://www.omicsnet.org/bcancer/database)). **B**, mRNA expression levels of TAZ in different breast cancer cell lines are examined with Cancer Cell Line Encyclopedia database (<https://portals.broadinstitute.org/ccle>). The red columns represent the TNBC cells, the blue ones represent the HER2<sup>+</sup> Breast Cancer cells, the green ones represent the luminal breast cancer. **C**, Copy number variation (CNV) analysis was performed by using the Breast Cancer Integrative Platform database (<http://www.omicsnet.org/bcancer/database>).

**Figure S2. Early passages of TAZ-depleted cells show shortened telomeres but no changes of hTERT expression.** **A and B**, Western blot analyses of TAZ in the indicated MDA-MB-231 and BT549 cells. Quantification of Western blots is shown in Fig. S5 O and P. **C and D**, qPCR analyses to determine hTERT mRNA levels in the indicated MDA-MB-231 and BT549 cells. **E and F**, Western blot analyses of hTERT in the indicated MDA-MB-231 and BT549 cells. Quantification of MDA-MB-231 Western blots is shown in Fig. S5Q. **G and H**, Telomere-specific qPCR analyses in the indicated MDA-MB-231 and BT549 cells to determine the relative telomere length. **I and J**, Southern analysis of TRFs in the indicated MDA-MB-231 and BT549 cells to determine the relative telomere length. For A-J, cells were lysed after 48 h of transfection, representing the short-term knockdown of TAZ expression. **K**, TAZ-depleted MDA-MB-231 cells were prepared with shRNA and cultured for different passages as indicated. Telomere-specific qPCR analyses were performed. A progressively shortening of telomeres during passage elongation in TAZ-depleted cells was observed. **L**, The mRNA levels of TAZ and hTERT were examined by qPCR in BT549 cells transfected with TAZ-specific shRNA for 48 h. Data are presented as mean±SEM. At least three repeats were carried out for each test. The p values were determined by one-way ANOVA followed by Tukey's multiple-comparisons. NS, not significant, \*p<0.05, \*\*p<0.01, \*\*\*p<0.001.

**Figure S3. Early passages of TAZ-depleted TNBC cells show no changes of shelterin proteins.** Western blot analysis of shelterin proteins in short-term TAZ knockdown (transfected with siRNA for 48 h) MDA-MB-231 cells (left panel) and BT549 cells (right panel). Quantification of MDA-MB-231 Western blots is shown in Fig. S5R.

**Figure S4. Knockdown of TAZ activates TERRAs transcription and p53 nuclear translocation.** **A-D**, qPCR analyses showing the changes of the expression of distinct TERRA transcripts from different chromosomes (chr-

2q, chr-9p, chr-10q, chr-13q, chr-17p and chr-xqyq) in MDA-MB-231 and BT549 cells with short-term TAZ knockdown (transfected with siRNA for 48 h) or long-term TAZ knockdown (infected with shRNA and cultured >6 passages). Data are presented as mean±SEM. At least three repeats were carried out for each test. The p values were determined by one-way ANOVA followed by Tukey's multiple-comparisons. NS, not significant, \*p<0.05, \*\*p<0.01, \*\*\*p<0.001.

**Figure S5. Quantification of western blotting.** **A**, Quantification of the data obtained in Fig1A. **B**, Quantification of the data obtained in Fig1C. **C**, Quantification of the data obtained in Fig2A. **D**, Quantification of the data obtained in Fig2D. **E**, Quantification of the data obtained in Fig2G. **F**, Quantification of the data obtained in Fig3C. **G**, Quantification of the data obtained in Fig4A. **H**, Quantification of the data obtained in Fig4B. **I**, Quantification of the data obtained in Fig4D. **J**, Quantification of the data obtained in Fig5A. **K**, Quantification of the data obtained in Fig5C. **L**, Quantification of the data obtained in Fig5F. **M**, Quantification of the data obtained in Fig5H. **N**, Quantification of the data obtained in Fig6B. **O**, Quantification of the data obtained in FigS2A. **P**, Quantification of the data obtained in FigS2B. **Q**, Quantification of the data obtained in FigS2E. **R**, Quantification of the data obtained in FigS3. Data are presented as mean±SEM. At least three repeats were carried out for each test. Statistical analyses were performed with unpaired Student's t-test between two groups and one -way ANOVA followed by Tukey's multiple-comparisons for multiple groups. NS, not significant, \*p<0.05, \*\*p<0.01, \*\*\*p<0.001.

## Supplementary Tables

### Supplementary Table S1

|             |                       |
|-------------|-----------------------|
| si-Cont.    | UUCUCCGAACGUGUCACGUTT |
| si-TAZ#1    | GCUCAUGAGUAUGCCCAAUTT |
| si-TAZ#2    | GGUACUUCCUCAAUCAUTT   |
| sh-Cont.    | TTCTCCGAACGTGTCACG    |
| sh-TAZ#1    | GATGAATCAGCCTCTGAAT   |
| sh-TAZ#2    | CCTTTCTAACCTGGCTGTA   |
| si-CTNNB1#1 | GGAUGUGGAUACCUCCCAATT |
| si-CTNNB1#2 | CCCACUAAUGUCCAGCGUUTT |
| si-p53      | CCACUGGAUGGAGAAUAUUTT |
| si-RAD51C#1 | CAAAGAAGGAGCUAAUAATT  |
| si-RAD51C#2 | CCUUGCUACUGCCUGCAUUTT |

Supplementary Table S2

|                 |                                         |
|-----------------|-----------------------------------------|
| TAZ-F           | GCUCAUGAGUAUGCCCAAUTT                   |
| TAZ-R           | GGUACUUCCUCAAUCAUAUTT                   |
| IL-1a-F         | GATCAGTACCTCACGGCTGC                    |
| IL-1a-R         | GCATCTCCTTCAGCAGCACT                    |
| IL-1b-F         | CCAGCTACGAATCTCCGACC                    |
| IL-1b-R         | GGGAAAGAAGGTGCTCAGGT                    |
| IL6-F           | CCAGAGCTGTGCAGATGAGT                    |
| IL6-R           | GCATTTGTGGTTGGGTCAGG                    |
| IL8-F           | CTCCAAACCTTTCCACCCCA                    |
| IL8-R           | TTCTCCACAACCCTCTGCAC                    |
| Tel-F           | GGTTTTTGAGGGTGAGGGTGAGGGTGAGGGTGAGGGT   |
| Tel-R           | TCCCGACTATCCCTATCCCTATCCCTATCCCTATCCCTA |
| HBG-F           | GCTTCTGACACAACACTGTGTTCACTAGC           |
| HBG-R           | CACCAACTTCATCCACGTTCCACC                |
| hTERT-F         | GCCTTCAAGAGCCACGTC                      |
| hTERT-R         | CCACGAACTGTCCGATGT                      |
| Terc-F          | GTGGTGGCCATTTTTTGTCTAAC                 |
| Terc-R          | TGCTCTAGAATGAACGGTGGAA                  |
| Rad51C-F        | GAAAAACACAAGGGAGAGGAAC                  |
| Rad51C-R        | GTA ACTCTGTGTAGTCACGACA                 |
| TERRA-chr-2q-F  | GCCTTGCCTTGGGAGAATCT                    |
| TERRA-chr-2q-R  | AAAGCGGGAAACGAAAAGC                     |
| TERRA-chr-9p-F  | GAGATTCTCCCAAGGCAAGG                    |
| TERRA-chr-9p-R  | ACATGAGGAATGTGGGTGTTAT                  |
| TERRA-chr-10q-F | AAAGCGGGAAACGAAAAGC                     |
| TERRA-chr-10q-R | GCCTTGCCTTGGGAGAATCT                    |
| TERRA-chr-13q-F | CCTGCGCACCGAGATTCT                      |
| TERRA-chr-13q-R | GCACTTGAACCCTGCAATACAG                  |

|                         |                               |
|-------------------------|-------------------------------|
| <b>TERRA-chr-17p-F</b>  | <b>CTTATCCACTTCTGTCCCAAGG</b> |
| <b>TERRA-chr-17p-R</b>  | <b>CCCAAAGTACACAAAGCAATCC</b> |
| <b>TERRA-chr-XqYq-F</b> | <b>CCCCTTGCCTTGGGAGAA</b>     |
| <b>TERRA-chr-XqYq-R</b> | <b>GAAAGCAAAAGCCCCTCTGA</b>   |
| <b>GAPDH-F</b>          | <b>AGAAGGCTGGGGCTCATTTG</b>   |
| <b>GAPDH-R</b>          | <b>AGGGGCCATCCACAGTCTTC</b>   |

**Figure S1**

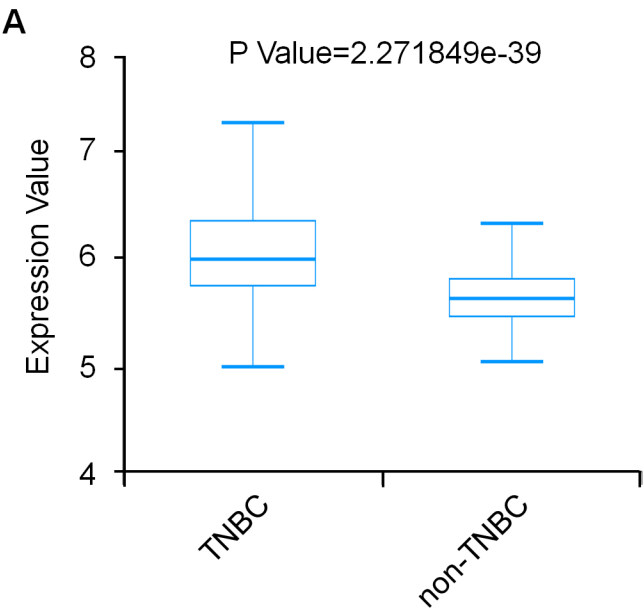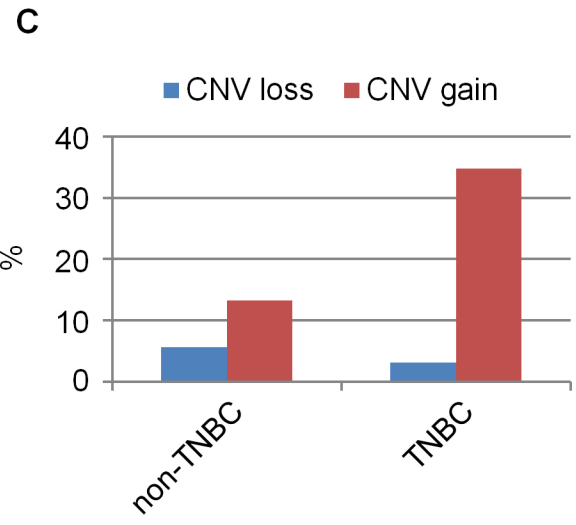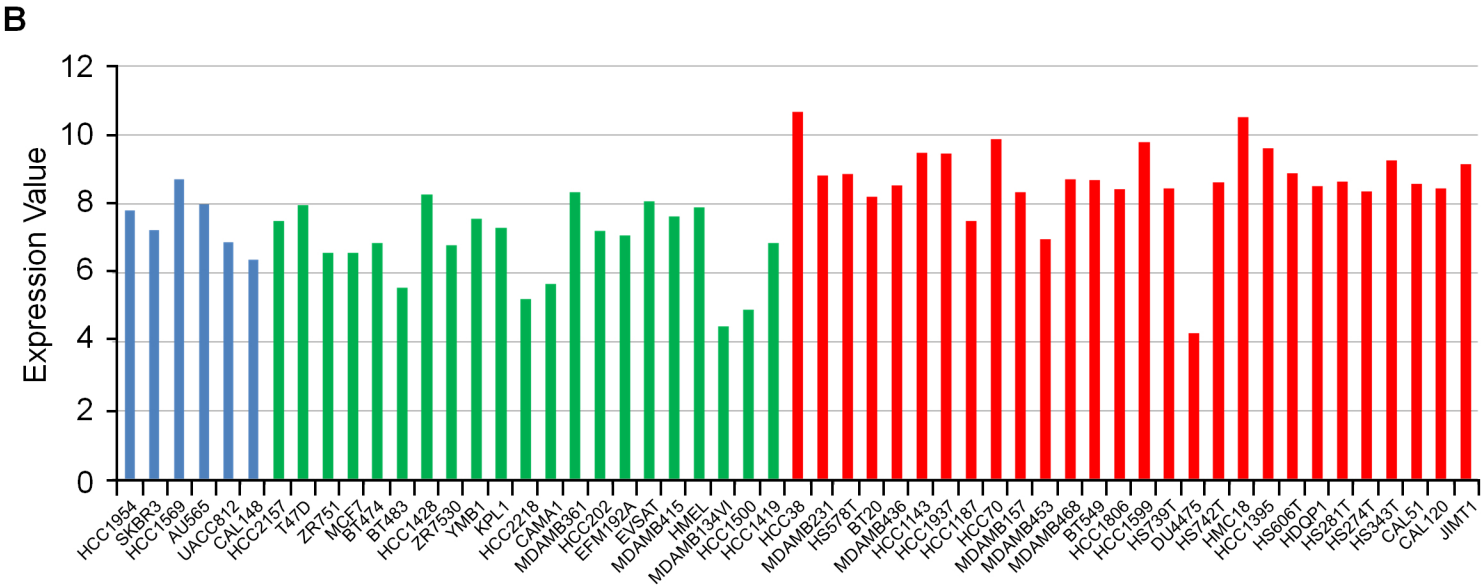

Figure S2

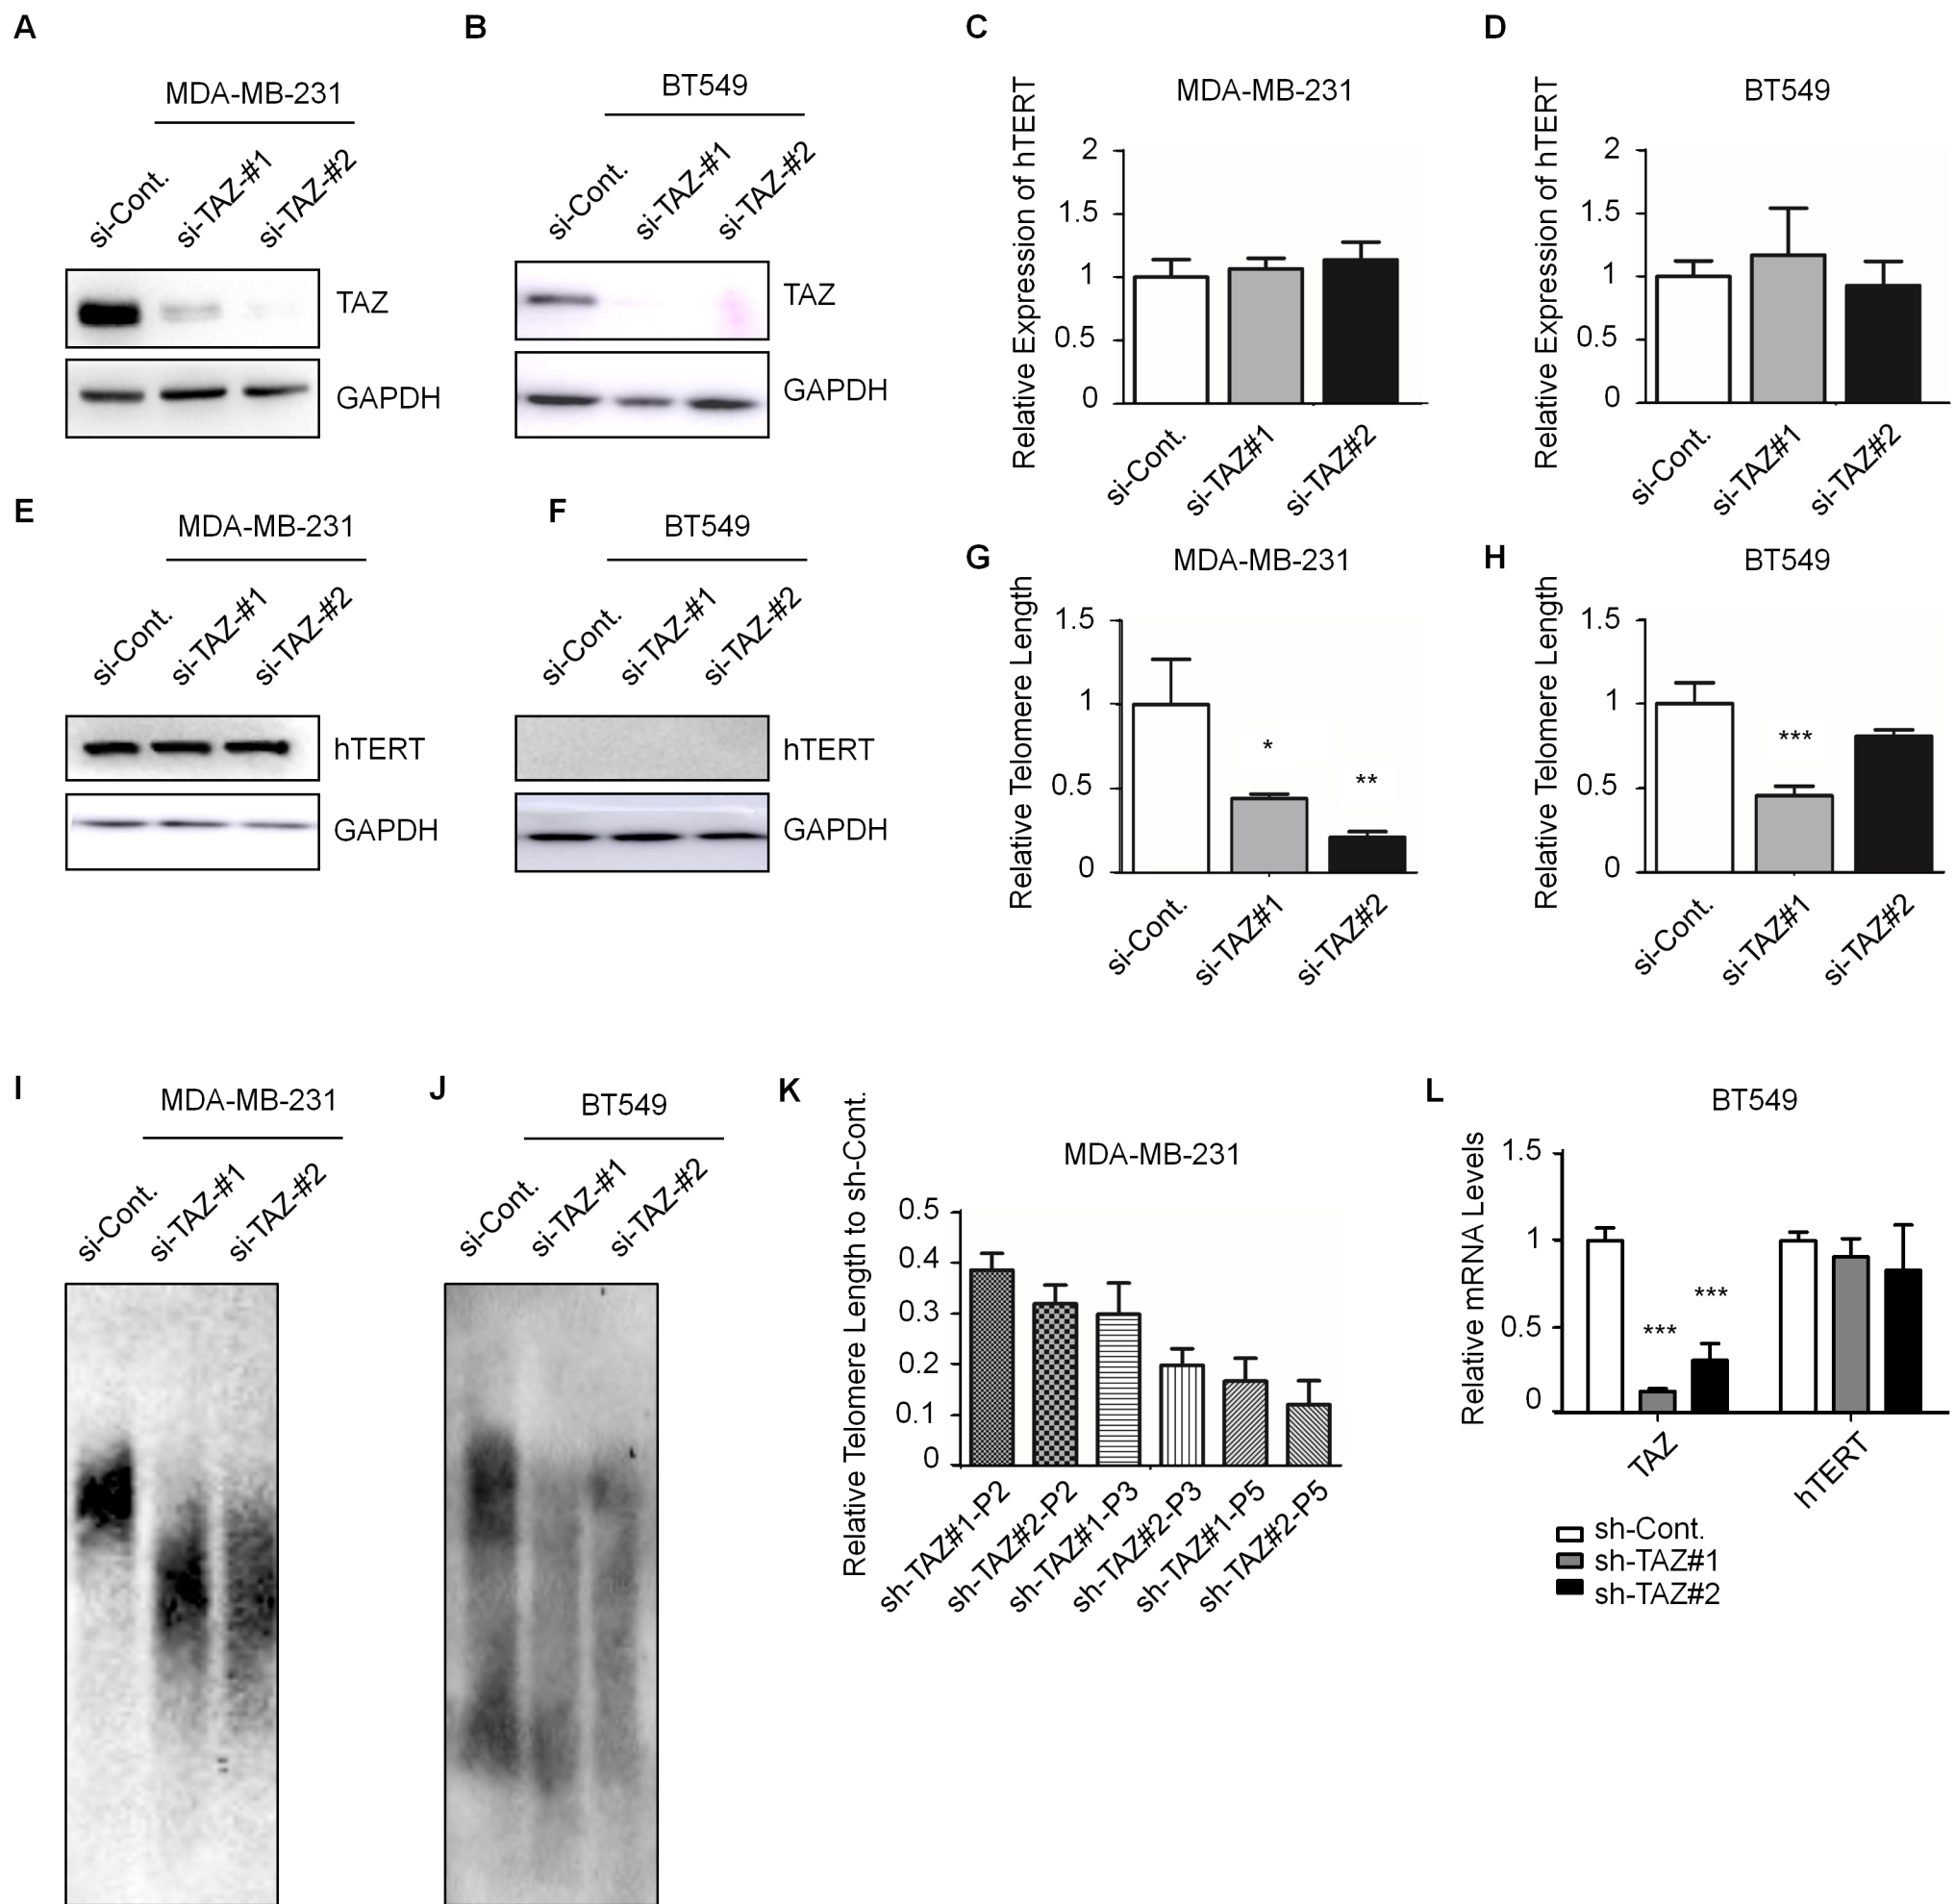

# Figure S3

MDA-MB-231

BT549

si-Cont.

si-TAZ#1

si-TAZ#2

si-Cont.

si-TAZ#1

si-TAZ#2

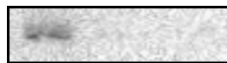

TAZ

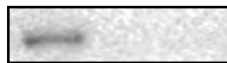

TAZ

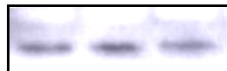

TRF1

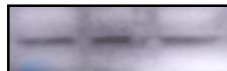

TRF1

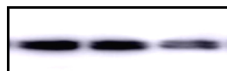

TRF2

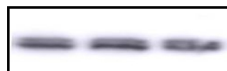

TRF2

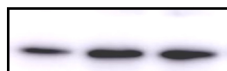

POT1

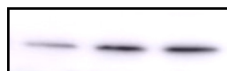

POT1

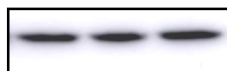

TIN2

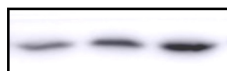

TIN2

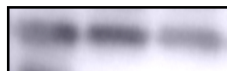

RAP1

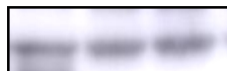

RAP1

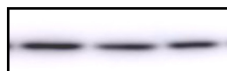

GAPDH

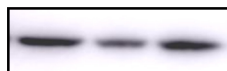

GAPDH

**Figure S4****A**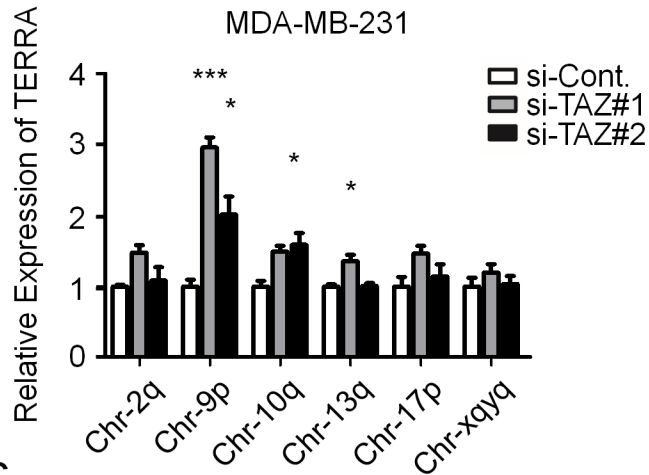**B**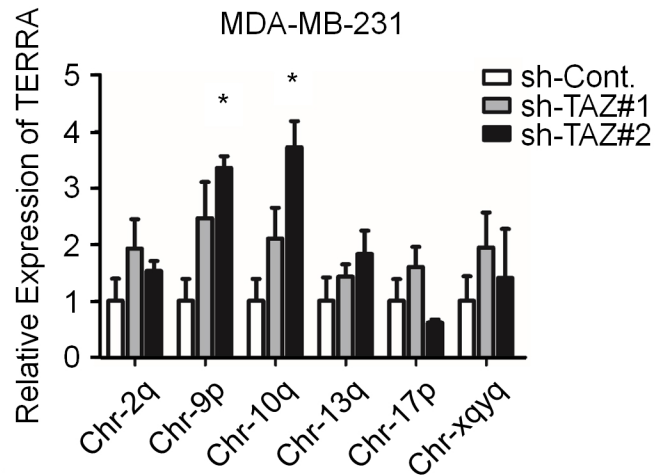**C**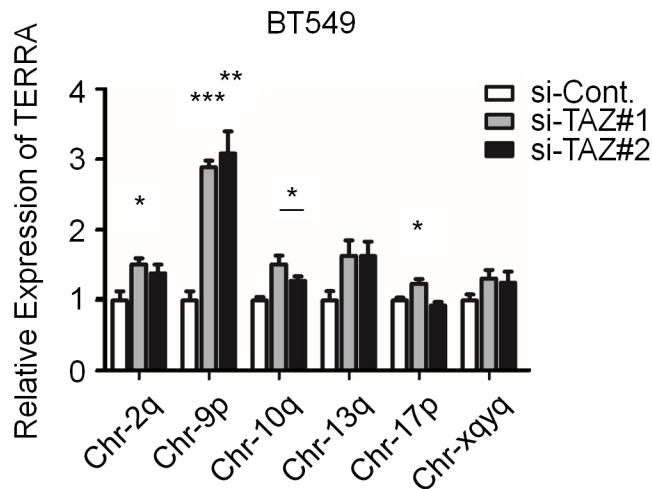**D**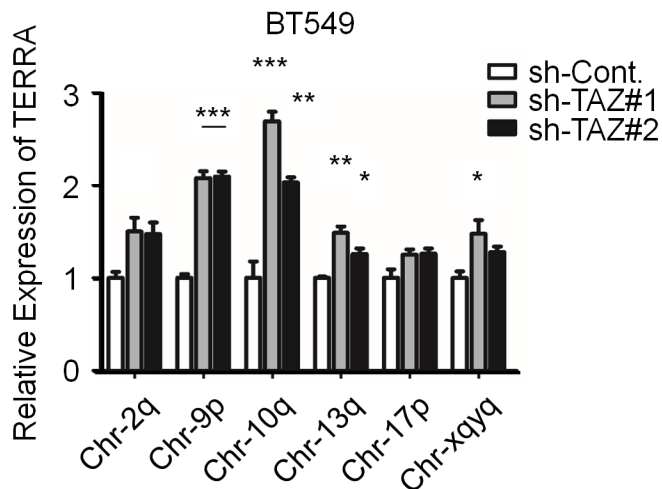



**Figure S5**

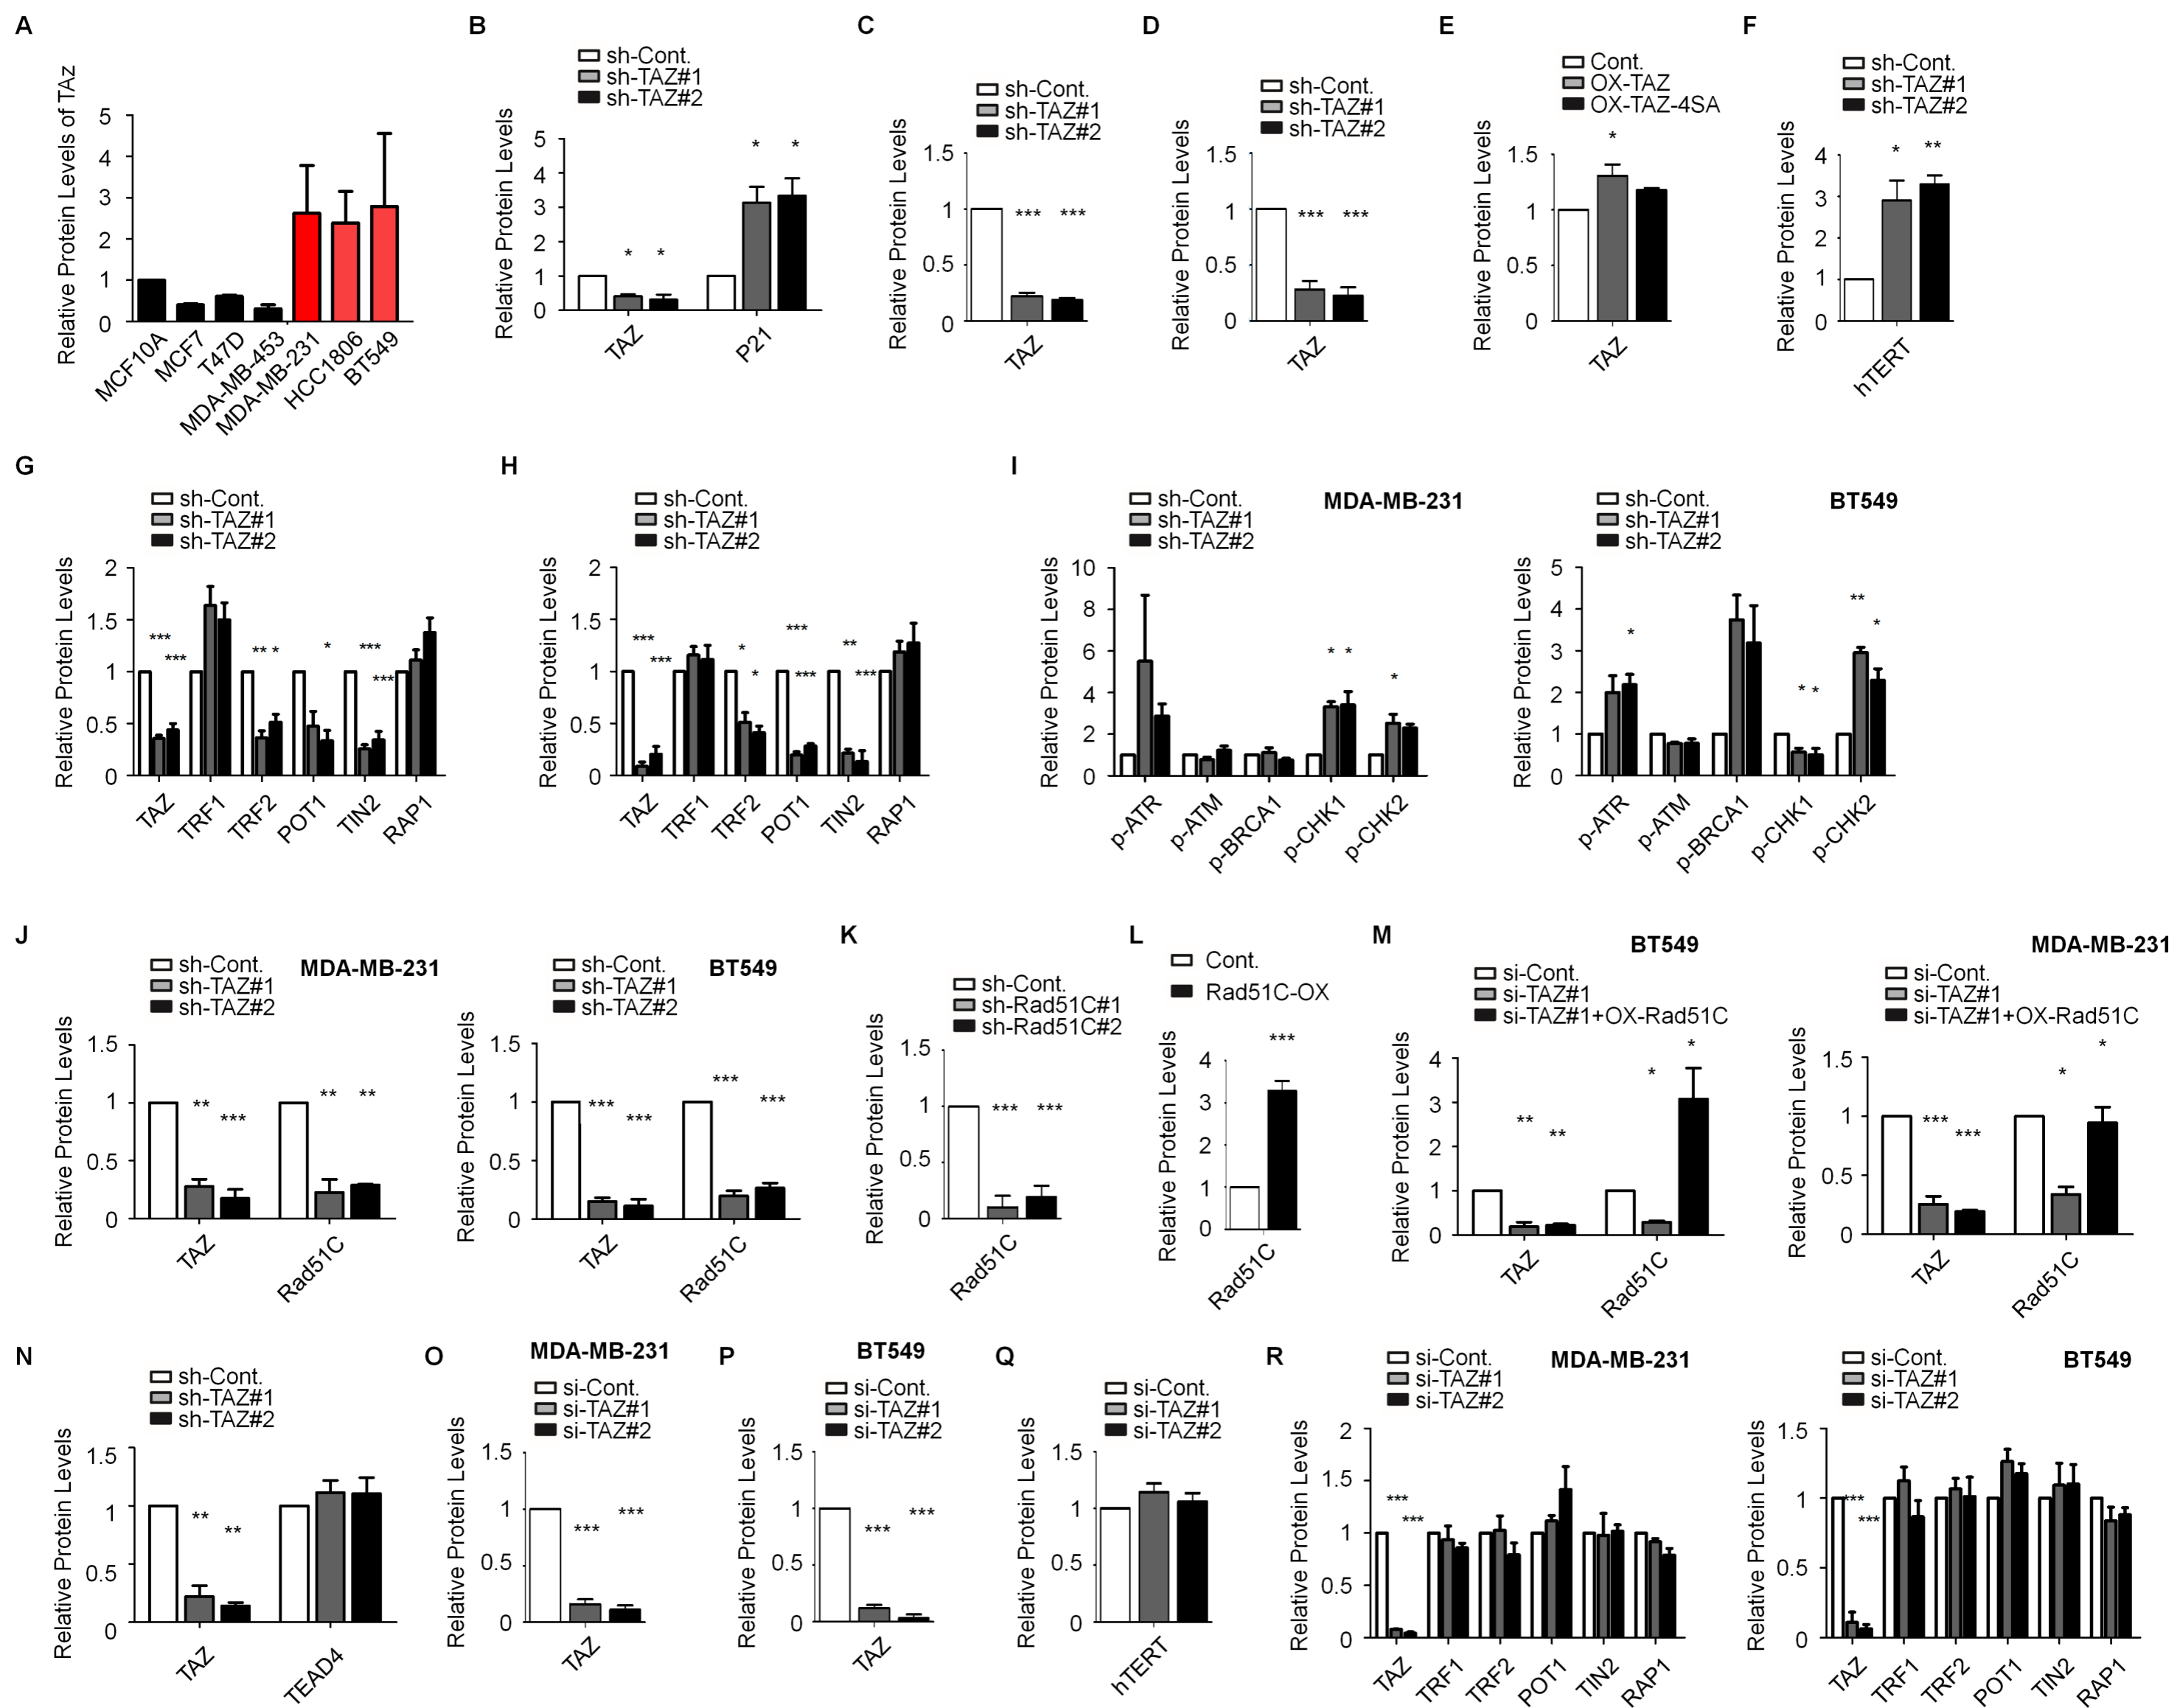

Supplement: MOESM1 [file 19636766]
